# Supplementary material for: Mapping Pharmacological Network of Multi-Targeting Litchi Ingredients in Cancer Therapeutics
Source: Front Pharmacol. 2020 Apr 24;11:451. doi: 10.3389/fphar.2020.00451 (PMC7193898; doi:10.3389/fphar.2020.00451)
Supplement: Supplementary file 1 [file Table_1.xlsx]

## Sheet: Sheet1
Ingredients	Targets
(-)-Epicatechin	AKT1
(-)-Epicatechin	MAPK1
(-)-Epicatechin	NFKB
(-)-Epicatechin	RAS
(+)-Catechin	CCNA
(+)-Catechin	CCNB1
(+)-Catechin	CDK2
(+)-Catechin	CDK4
(+)-Catechin	JNK
(+)-Catechin	MAPK1
(+)-Catechin	MAPK14
(+)-Catechin	MAPK9
Betulinic acid	MIR27A
Betulinic acid	SP1
Betulinic acid	YY1
Betulinic acid	ZBTB10
Chlorogenic acid	MAPK1
Chlorogenic acid	ROS1
Cyanidin-3-glucoside	MAPKI67
Cyanidin-3-glucoside	MUCIN4
ECG	ATF3
ECG	CCNB1
ECG	CCND1
ECG	CCND3
ECG	CCNE
ECG	CDC2
ECG	CDK4
ECG	CDK6
ECG	CDKN1A
ECG	CDKN1B
ECG	CDKN2B
ECG	GDF15
ECG	TP53
ECG	TRAF1
EGCG	AKT1
EGCG	AP1
EGCG	APAF1
EGCG	ATM
EGCG	BIRC5
EGCG	CCNB1
EGCG	CDC2
EGCG	CDKN1A
EGCG	CYC
EGCG	DIABLO
EGCG	EGFR
EGCG	ERBB2
EGCG	ERBB3
EGCG	FAS
EGCG	FASLG
EGCG	GDF15
EGCG	JNK1
EGCG	JNK2
EGCG	MAPK1
EGCG	MAPK14
EGCG	MAPK3
EGCG	MLH1
EGCG	MSH2
EGCG	MTCO2
EGCG	MYC
EGCG	NFKB
EGCG	PARP1
EGCG	PEG2
EGCG	PGE2
EGCG	PIK3CA
EGCG	PRKAA2
EGCG	PTEN
EGCG	PTK2
EGCG	SP1
EGCG	TP53
EGCG	XRCC6
Gallic acid	AKT1
Gallic acid	CCNA
Gallic acid	CCNB1
Gallic acid	CCND1
Gallic acid	CCND3
Gallic acid	CCNE
Gallic acid	CDC25C
Gallic acid	CDC2C
Gallic acid	CDK
Gallic acid	CDK2
Gallic acid	CDK4
Gallic acid	CDK6
Gallic acid	CDKN1A
Gallic acid	CDKN1B
Gallic acid	CHEK1
Gallic acid	CHEK2
Gallic acid	INK4
Gallic acid	MAPK1
Gallic acid	MAPK14
Gallic acid	P18
Gallic acid	PIK3CA
Gallic acid	SKP2
Kaempferol	AKT1
Kaempferol	CCNA
Kaempferol	CCNB1
Kaempferol	CCND1
Kaempferol	CCNE
Kaempferol	CDC2
Kaempferol	CDC25C
Kaempferol	CDK1
Kaempferol	CDK2
Kaempferol	CDK20
Kaempferol	CDK4
Kaempferol	CDK5R1
Kaempferol	CDKN1A
Kaempferol	CHEK1
Kaempferol	CHEK2
Kaempferol	CMET
Kaempferol	DNMT3B
Kaempferol	ERBB3
Kaempferol	ERRA
Kaempferol	ERRG
Kaempferol	GTF2H2
Kaempferol	HIF1A
Kaempferol	IGF1
Kaempferol	IGF1R
Kaempferol	MAP1LC3A
Kaempferol	MAPK1
Kaempferol	MAPK14
Kaempferol	MAPK3
Kaempferol	MCL1
Kaempferol	MIR21
Kaempferol	MIR340
Kaempferol	MTOR
Kaempferol	PIK3CA
Kaempferol	PIK3R1
Kaempferol	PRKAA2
Kaempferol	PTEN
Kaempferol	SQSTM1
Kaempferol	TP53
Kaempferol	USF2
Lupeol	AKT1
Lupeol	BCL2
Lupeol	CCNA2
Lupeol	CCNB
Lupeol	CCND3
Lupeol	CDC2
Lupeol	CDC26C
Lupeol	CDK2
Lupeol	CDKN1A
Lupeol	CDKN1B
Lupeol	CDKN2A
Lupeol	CLAUDIN1
Lupeol	CTNNB1
Lupeol	MAPK1
Lupeol	MYC
Lupeol	PLK1
Lupeol	TCF4
Lupeol	TP53
Naringenin	CCND1
Naringenin	EREG
Naringenin	ESR2
Naringenin	MAPK1
Naringenin	MAPK14
Naringin	AKT1
Naringin	BIRC5
Naringin	CDKN1A
Naringin	CTNNB1
Naringin	EGFR
Naringin	MAPK1
Naringin	MIR126
Naringin	MTOR
Naringin	NFKB
Naringin	PIK3CA
Naringin	VCAM1
PA	FGF2
PA	JNK
PA	MAPK03
PA	MAPK1
PA	MAPK14
PA	NFKB
PA	NFKB1
PA	PTK2
PA	RELA
